# Supplementary material for: A non-fullerene acceptor with a diagnostic morphological handle for streamlined screening of donor materials in organic solar cells
Source: Royal Society of Chemistry journal article supplement (doi:10.1039/c7ta05282k), 2017-01-01
Supplement: c7ta05282k1.pdf [file c7ta05282k1.pdf]

## **A Non-Fullerene Acceptor with a Diagnostic Morphological Handle for Streamlined Screening of Donor Materials in Organic Solar Cells**

Seth M. McAfee,<sup>a</sup> Abby-Jo Payne,<sup>a</sup> Sergey V. Dayneko,<sup>a</sup> Gururaj P. Kini,<sup>b</sup> Chang Eun Song,<sup>b</sup> Jong-Cheol Lee,<sup>b</sup> and Gregory C. Welch<sup>a\*</sup>

<sup>a</sup>Department of Chemistry, University of Calgary, 2500 University Drive N.W., Calgary, Alberta, T2N 1N4

<sup>b</sup>Advanced Materials Division, Korea Research Institute of Chemical Technology (KRICT), 141 Gajeongro, Yuseong, Daejeon 34114, Republic of Korea

\*Corresponding Author  
Email: gregory.welch@ucalgary.ca  
Phone Number: 1 (403) 210 7603

**SUPPORTING INFORMATION**

## TABLE OF CONTENTS

|                            |        |
|----------------------------|--------|
| Materials and methods      | S3     |
| Synthesis                  | S4     |
| Electrochemical properties | S4-5   |
| Active layer processing    | S6-7   |
| Device fabrication         | S8     |
| Device screening           | S9-11  |
| Device optimization        | S12-18 |
| Control devices            | S19-20 |
| Device stability           | S21-24 |
| Active layer thickness     | S25    |
| Solution UV-vis spectra    | S26    |
| References                 | S27    |

## **Materials and methods**

**Materials:** All compounds and solvents were purchased from Sigma-Aldrich unless indicated otherwise. Ag evaporation slugs, Mo and W evaporation boats were purchased from R.D. Mathis.

**Cyclic Voltammetry (CV):** All electrochemical measurements were performed using a CH Instruments potentiostat in a standard three-electrode configuration equipped with a silver wire pseudo-reference, platinum wire counter electrode and glassy carbon working electrode. The cyclic voltammetry experiments were performed in an anhydrous solution of dichloromethane ( $\text{CH}_2\text{Cl}_2$ ) with  $\sim 0.1$  M tetrabutylammoniumhexafluorophosphate ( $\text{TBAPF}_6$ ) supporting electrolyte. Samples were scanned at a rate of 100 mV/s following a dry  $\text{N}_2$  purge to deoxygenate the solution. Solution CV measurements were carried out with a sample concentration of  $\sim 0.5$  mg/mL in  $\text{CH}_2\text{Cl}_2$ . Estimations of the energy levels were obtained by correlating the onset ( $E_{\text{ox}} \text{Fc}/\text{Fc}^+$ ,  $E_{\text{red}} \text{Fc}/\text{Fc}^+$ ) to the normal hydrogen electrode (NHE), assuming an ionization potential of 4.80 eV for  $\text{Fc}/\text{Fc}^+$ .<sup>1</sup>

$E(\text{Ionization Potential}) = - (E_{\text{ox}} + 4.80)$ ,  $E(\text{Electron Affinity}) = - (E_{\text{red}} + 4.80)$

**UV-Visible Spectroscopy (UV-vis):** All absorption measurements were recorded using an Agilent Technologies Cary 60 UV-vis spectrometer at room temperature. All solution UV-vis experiments were run in chloroform ( $\text{CHCl}_3$ ) using 2 mm quartz cuvettes and diluted 1 wt/v% solutions. Thin-films were prepared by spin-coating 1 wt/v% solutions from  $\text{CHCl}_3$  onto Corning glass micro slides. Prior to use, glass slides were cleaned with soap and water, acetone and isopropanol, and followed by UV/ozone treatment using a Novascan UV/ozone cleaning system.

**Power Conversion Efficiency (PCE) and External Quantum Efficiency (EQE):** The current density-voltage (J-V) curves were measured by a Keithley 2420 source measure unit. The photocurrent was measured under AM 1.5 illumination at  $100\text{mW}/\text{cm}^2$  under a Solar Simulator (Newport 92251A-1000). The standard silicon solar cell (Newport 91150V) was used to calibrate light intensity. EQE was measured in a QEX7 Solar Cell Spectral Response/QE/IPCE Measurement System (PV Measurement, Model QEX7, USA) with an optical lens to focus the light into an area about  $0.04\text{cm}^2$ , smaller than the dot cell. The silicon photodiode was used to calibration of the EQE measurement system in the wavelength range from 300 to 1100 nm.

**Atomic Force Microscopy (AFM):** AFM measurements were performed by using a TT2-AFM (AFM Workshop) in tapping mode and WSxM software with an 0.01-0.025 Ohm/cm Sb (n) doped Si probe with a reflective back side aluminum coating. Samples for AFM measurement were the same ones that were used to collect the respective device parameters and EQE profiles.

## Synthesis

**Materials Synthesis:** Small molecule acceptor **PDI-DPP-PDI** was synthesized according to our previously reported literature procedure.<sup>2</sup> **P3HT** was provided by Brilliant Matters and **PCDTBT** was provided by the research group of Mario Leclerc. **PDTT-BOBT** was provided by the research group of Jong-Cheol Lee and synthesized according to their published procedure.<sup>3</sup>

## Electrochemical properties

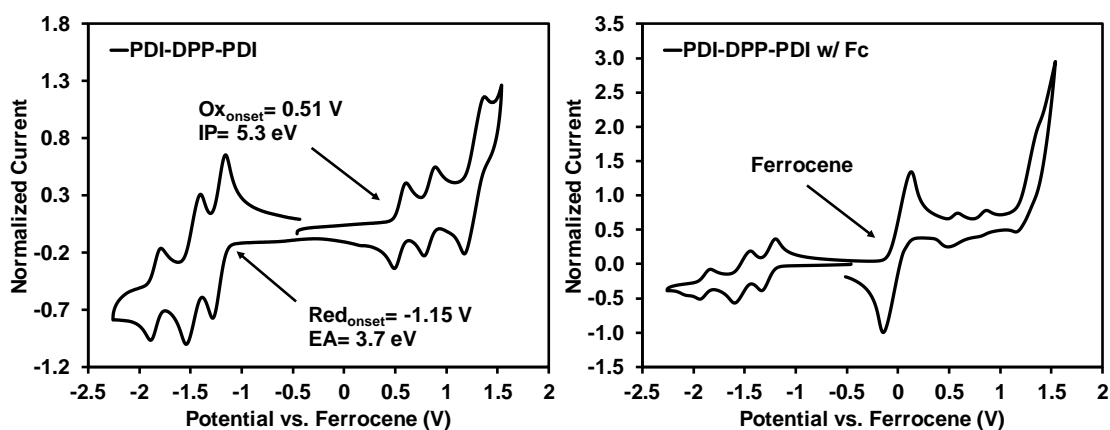

Figure S1. Cyclic voltammogram of **PDI-DPP-PDI** (left) with ferrocene reference (right).

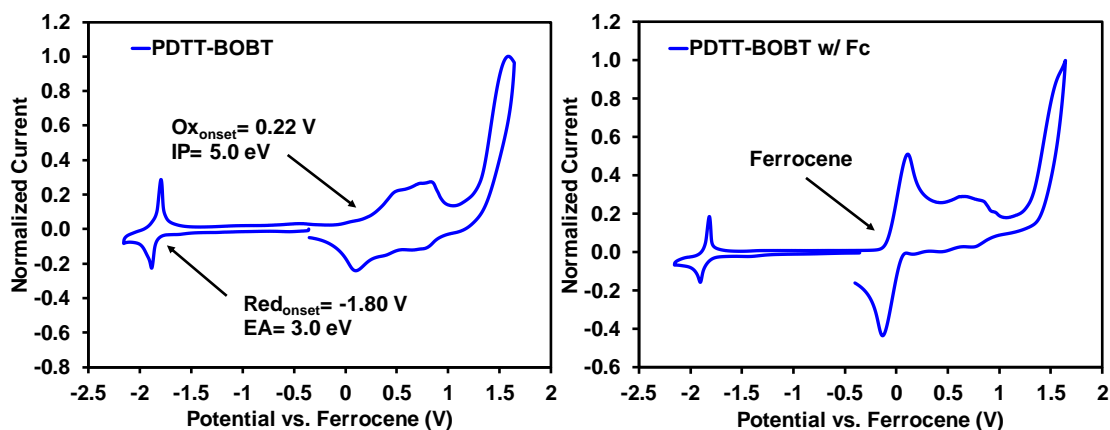

Figure S2. Cyclic voltammogram of **PDTT-BOBT** (left) with ferrocene reference (right).

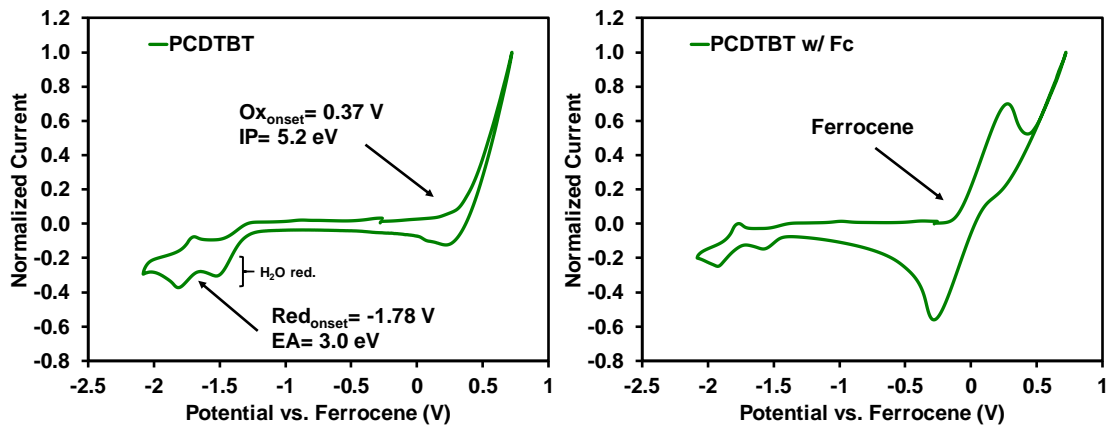

Figure S3. Cyclic voltammogram of *PCDTBT* (left) with ferrocene reference (right).

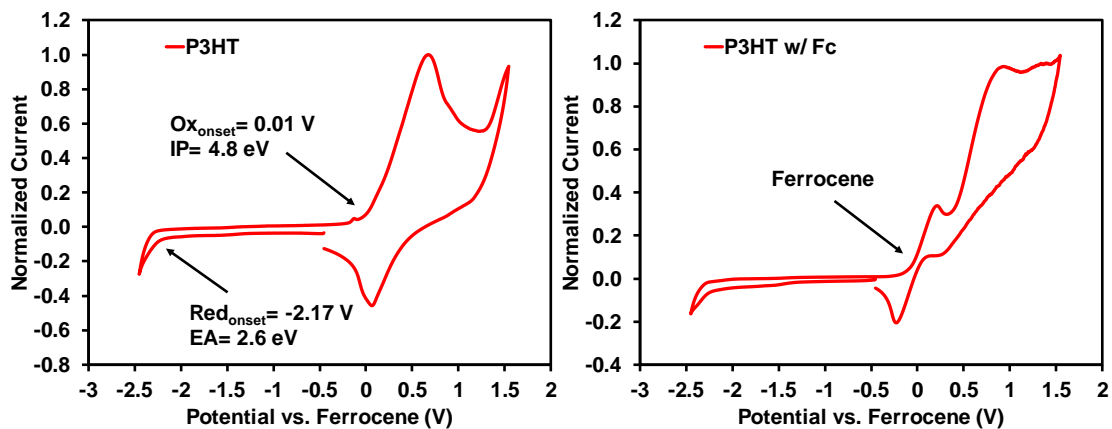

Figure S4. Cyclic voltammogram of *P3HT* (left) with ferrocene reference (right).

## Active Layer Processing

To investigate the use of solvent vapour annealing as a post-deposition processing technique glass substrates were cleaned by sequentially ultra-sonicating detergent and de-ionized water, acetone and isopropanol followed by exposure to UV/ozone for 15 minutes. Thin-films of **PX:PDI-DPP-PDI** ( $X = \text{P3HT}, \text{PCDTBT}, \text{PDTT-BOBT}$ ) in a 40:60 blend ratio were cast at 1500 rpm for 60s from a 1 wt/v% solution in chloroform.

The as-cast devices were subject to solvent vapour annealing by containing a raised as-cast substrate within a screw cap glass jar with 0.5 mL of  $\text{CHCl}_3$  as the solvent in the bottom of the jar. Substrates were left exposed to the solvent vapour for two-minute intervals until no significant changes in the absorption profile were observed by UV-vis spectroscopy. We recognized that uninterrupted solvent vapour annealing exposure led to a more rapid change in the UV-vis profile than the two-minute interval screening and therefore the optimal solvent vapour annealing time was determined based on the time interval two minutes before the UV-vis profile did not significantly change.

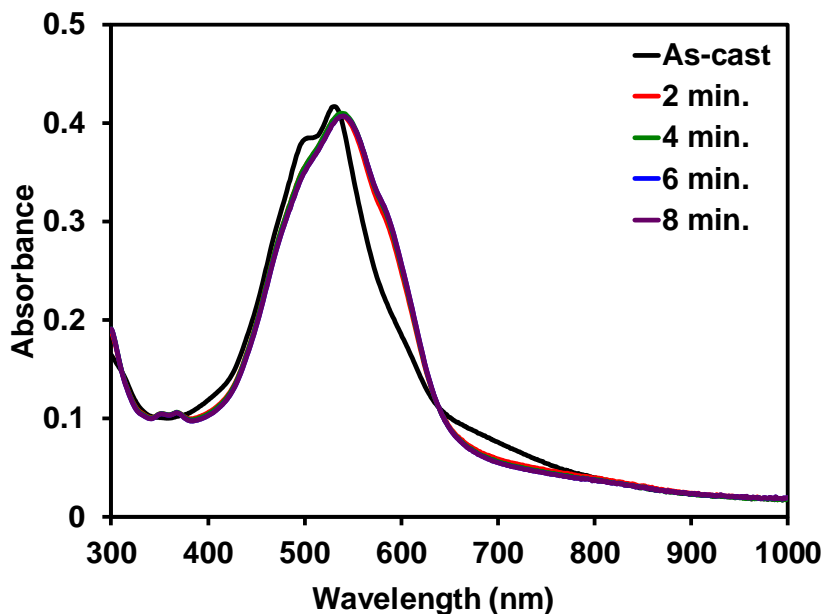

**Figure S5.** Optical absorption profiles for **P3HT:PDI-DPP-PDI** to screen solvent vapour annealing times. Suggested optimal time for screening: 4 minutes.

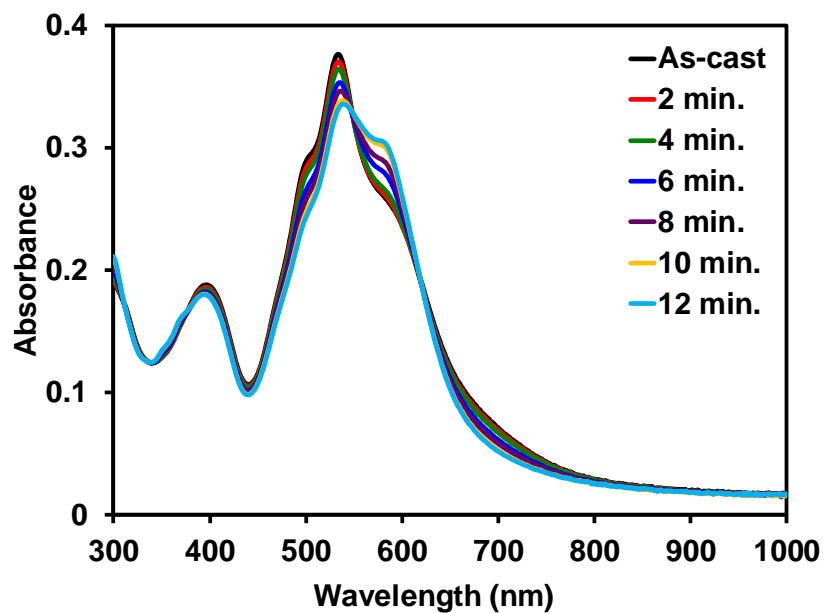

**Figure S6.** Optical absorption profiles for **PCDTBT:PDI-DPP-PDI** to screen solvent vapour annealing times. Suggested optimal time for screening: 8 minutes.

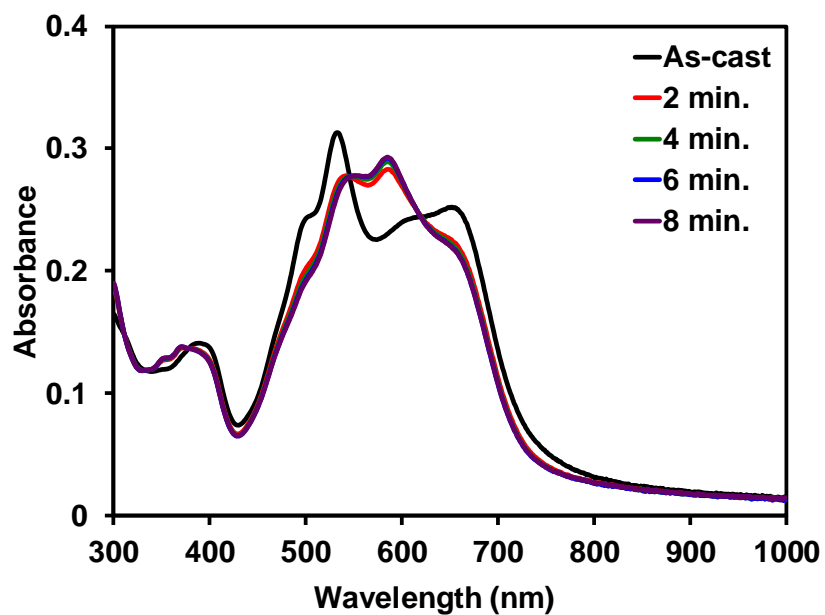

**Figure S7.** Optical absorption profiles for **PDTT-BOBT:PDI-DPP-PDI** to screen solvent vapour annealing times. Suggested optimal time for screening: 4 minutes.

## **Device Fabrication**

Devices were fabricated using ITO-coated glass substrates cleaned by sequentially ultra-sonicating detergent and de-ionized water, [NaOH] and de-ionized water, acetone and isopropanol followed by exposure to UV/ozone for 30 minutes.

ZnO was deposited as a sol-gel precursor solution in air following the method of Sun *et al.*<sup>4</sup> The room temperature solution was filtered and spin-cast at a speed of 4000 rpm for 60 seconds and then annealed at 200 °C in air for 15 minutes.

Active layer solutions of ***P3HT*** or ***PCDTBT*** or ***PDTT-BOBT*** and ***PDI-DPP-PDI*** or ***PC<sub>61</sub>BM*** were prepared in air with a total concentration 10 mg/mL in chloroform unless indicated otherwise. Individual solutions were stirred overnight at room temperature. Where indicated, active layer materials were combined in varying ratios without filtration of the individual solutions and cast at room temperature in air at a speed of 1500 rpm for 60 seconds.

Post-deposition solvent vapour annealing where indicated was carried out by containing a raised as-cast substrate within a screw cap glass jar with 0.5 mL of CHCl<sub>3</sub> as the solvent in the bottom of the jar. Substrates were left exposed to the solvent vapour for a pre-determined time.

The substrates were then transferred to an N<sub>2</sub> atmosphere glovebox overnight before evaporating MoO<sub>3</sub> and Ag the following day. In a bell jar, 10 nm of MoO<sub>3</sub> followed by 100 nm of Ag were thermally deposited under vacuum (1x10<sup>-6</sup> Torr). The active areas of resulting devices were 0.09 cm<sup>2</sup> unless indicated otherwise. Completed devices were then tested in air using a Newport 92251A-1000 AM 1.5 solar simulator which had been calibrated using a standard silicon solar cell (Newport 91150V) to obtain an irradiance level of 1000 W/m<sup>2</sup>.



## Device screening

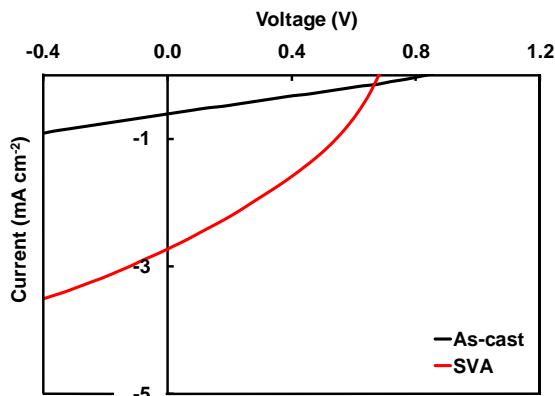

**Figure S8.** Current voltage curves for **P3HT:PDI-DPP-PDI** as-cast and 4 minute solvent vapour annealing with chloroform.

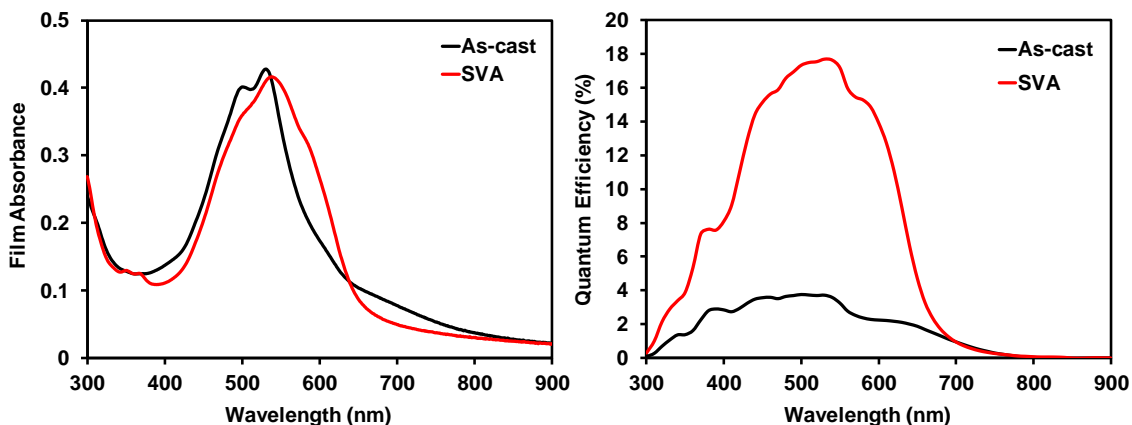

**Figure S9.** Optical absorption profiles (left) and EQE profiles (right) for **P3HT:PDI-DPP-PDI** as-cast and 4 minute solvent vapour annealing with chloroform.

**Table S1.** Device statistics for **P3HT:PDI-DPP-PDI** screening.

| Processing | Voc (V)       | Jsc (mAcm <sup>-2</sup> ) | FF (%)         | PCE (%)       |
|------------|---------------|---------------------------|----------------|---------------|
| As-cast    | 0.7727        | 0.5873                    | 27.1793        | 0.1233        |
| As-cast    | 0.7919        | 0.5949                    | 27.3028        | 0.1286        |
| As-cast    | <b>0.8334</b> | <b>0.6449</b>             | <b>26.0754</b> | <b>0.1401</b> |
| As-cast    | 0.8124        | 0.6341                    | 26.6082        | 0.1371        |
|            | <b>0.80</b>   | <b>0.62</b>               | <b>26.79</b>   | <b>0.13</b>   |
|            |               |                           |                |               |
| Processing | Voc (V)       | Jsc (mAcm <sup>-2</sup> ) | FF (%)         | PCE (%)       |
| SVA 4 min  | 0.6723        | 2.7210                    | 34.8699        | 0.6379        |
| SVA 4 min  | 0.6775        | 2.6396                    | 35.1215        | 0.6281        |
| SVA 4 min  | <b>0.6799</b> | <b>2.8907</b>             | <b>34.3447</b> | <b>0.6751</b> |
| SVA 4 min  | 0.6710        | 2.8758                    | 33.7196        | 0.6507        |
|            | <b>0.68</b>   | <b>2.78</b>               | <b>34.51</b>   | <b>0.65</b>   |

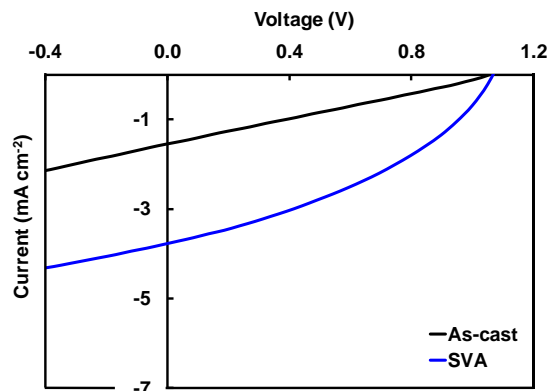

**Figure S10.** Current voltage curves for **PCDTBT:PDI-DPP-PDI** as-cast and 4 minute solvent vapour annealing with chloroform.

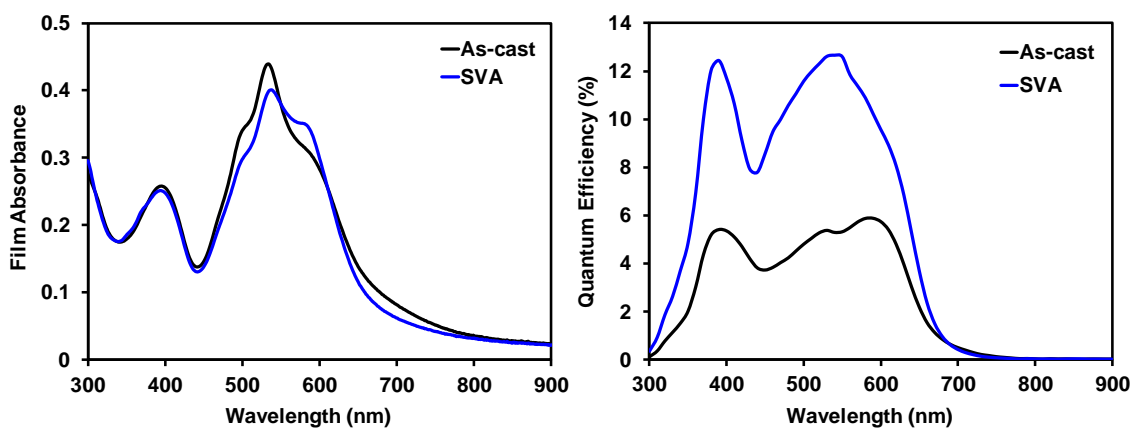

**Figure S11.** Optical absorption profiles (left) and EQE profiles (right) for **PCDTBT:PDI-DPP-PDI** as-cast and 4 minute solvent vapour annealing with chloroform.

**Table S2.** Device statistics for **PCDTBT:PDI-DPP-PDI** screening.

| Processing | Voc (V)     | Jsc (mAcm <sup>-2</sup> ) | FF (%)       | PCE (%)     |
|------------|-------------|---------------------------|--------------|-------------|
| As-cast    | 1.0554      | 1.5485                    | 26.0631      | 0.4259      |
| As-cast    | 1.0248      | 1.4116                    | 26.5036      | 0.3834      |
| As-cast    | 1.0218      | 1.4399                    | 26.6424      | 0.3920      |
| As-cast    | 1.0007      | 1.4255                    | 27.1139      | 0.3868      |
|            | <b>1.03</b> | <b>1.46</b>               | <b>26.58</b> | <b>0.40</b> |
|            |             |                           |              |             |
| Processing | Voc (V)     | Jsc (mAcm <sup>-2</sup> ) | FF (%)       | PCE (%)     |
| SVA 8 min  | 1.0409      | 3.5925                    | 37.9461      | 1.4189      |
| SVA 8 min  | 1.0482      | 3.7475                    | 37.7715      | 1.4837      |
| SVA 8 min  | 1.0627      | 3.7820                    | 37.9794      | 1.5264      |
| SVA 8 min  | 1.0606      | 3.4350                    | 37.8953      | 1.3806      |
|            | <b>1.05</b> | <b>3.64</b>               | <b>37.90</b> | <b>1.45</b> |

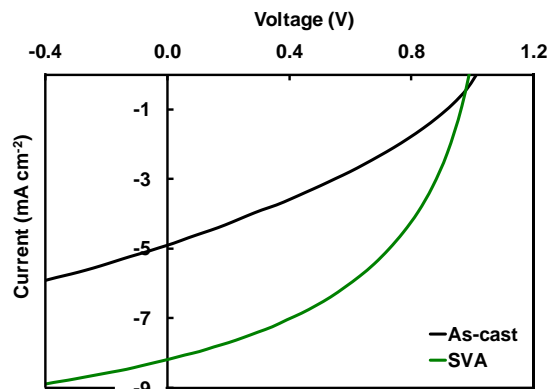

**Figure S12.** Current voltage curves for **PDDT-BOBT:PDI-DPP-PDI** as-cast and 4 minute solvent vapour annealing with chloroform.

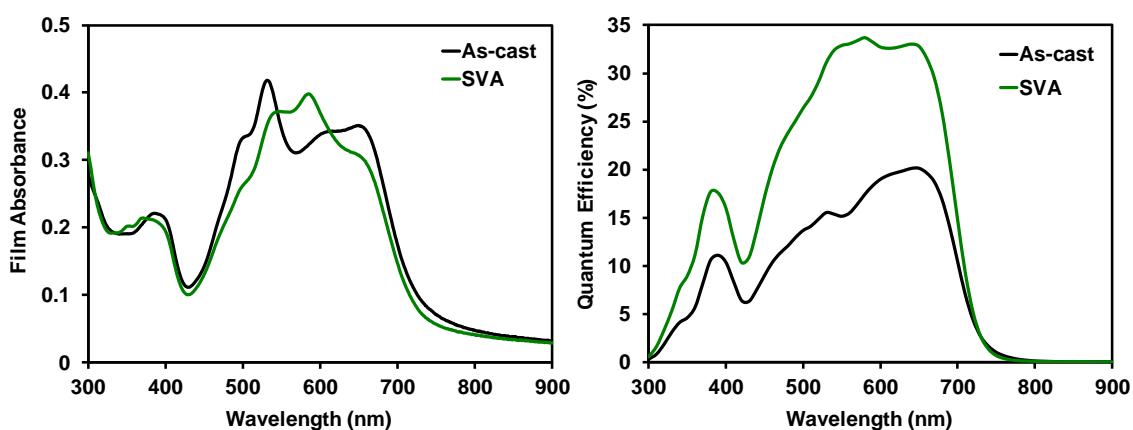

**Figure S13.** Optical absorption profiles (left) and EQE profiles (right) for **PDDT-BOBT:PDI-DPP-PDI** as-cast and 4 minute solvent vapour annealing with chloroform.

**Table S3.** Device statistics for **PDDT-BOBT:PDI-DPP-PDI** screening.

| Processing | Voc (V)       | Jsc (mAcm <sup>-2</sup> ) | FF (%)         | PCE (%)       |
|------------|---------------|---------------------------|----------------|---------------|
| As-cast    | 1.0221        | 4.7098                    | 33.4419        | 1.6098        |
| As-cast    | 1.0176        | 4.6668                    | 33.5160        | 1.5916        |
| As-cast    | <b>1.0104</b> | <b>4.9068</b>             | <b>33.6090</b> | <b>1.6663</b> |
| As-cast    | 0.9966        | 4.8728                    | 33.5004        | 1.6269        |
|            | <b>1.01</b>   | <b>4.79</b>               | <b>33.52</b>   | <b>1.62</b>   |
|            |               |                           |                |               |
| Processing | Voc (V)       | Jsc (mAcm <sup>-2</sup> ) | FF (%)         | PCE (%)       |
| SVA 4 min  | 0.9915        | 8.5893                    | 43.3615        | 3.6928        |
| SVA 4 min  | 0.9906        | 8.4719                    | 43.5684        | 3.6565        |
| SVA 4 min  | 0.9876        | 8.6899                    | 44.1305        | 3.7872        |
| SVA 4 min  | <b>0.9890</b> | <b>8.6898</b>             | <b>45.4030</b> | <b>3.9019</b> |
|            | <b>0.99</b>   | <b>8.61</b>               | <b>44.12</b>   | <b>3.76</b>   |

## Device optimization

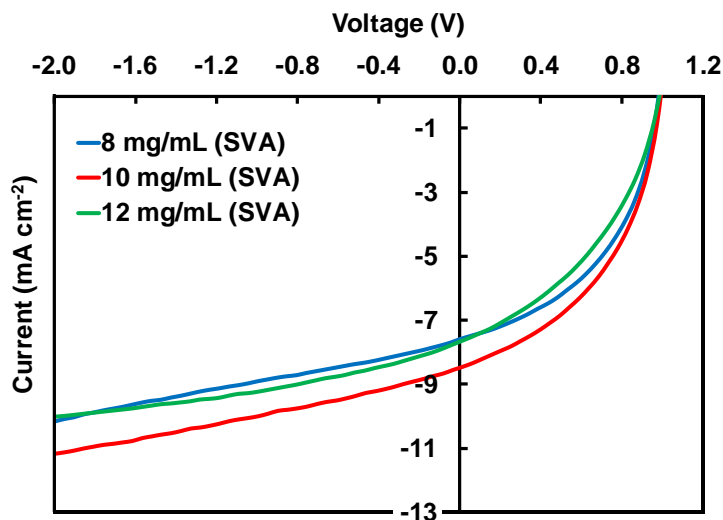

**Figure S14.** Current voltage curves for **PDTT-BOBT:PDI-DPP-PDI (40:60)** optimization of solution concentration upon solvent vapour annealing with chloroform for 4 minutes.

**Table S4.** Device statistics for **PDTT-BOBT:PDI-DPP-PDI** concentration optimization.

| Concentration | Voc (V)     | Jsc (mAcm <sup>-2</sup> ) | FF (%)       | PCE (%)     |  | Concentration | Voc (V)     | Jsc (mAcm <sup>-2</sup> ) | FF (%)       | PCE (%)     |
|---------------|-------------|---------------------------|--------------|-------------|--|---------------|-------------|---------------------------|--------------|-------------|
| 8 mg/mL       | 0.9801      | 7.5017                    | 46.2742      | 3.4023      |  | 12 mg/mL      | 0.9865      | 7.7586                    | 40.8159      | 3.1241      |
| 8 mg/mL       | 0.9690      | 7.3815                    | 45.4192      | 3.2488      |  | 12 mg/mL      | 0.9522      | 7.6556                    | 39.9287      | 2.9107      |
| 8 mg/mL       | 0.9821      | 7.5895                    | 47.1971      | 3.5180      |  | 12 mg/mL      | 0.9821      | 7.7172                    | 40.3952      | 3.0614      |
|               | <b>0.98</b> | <b>7.49</b>               | <b>46.30</b> | <b>3.39</b> |  |               | <b>0.97</b> | <b>7.71</b>               | <b>40.38</b> | <b>3.03</b> |
| Concentration | Voc (V)     | Jsc (mAcm <sup>-2</sup> ) | FF (%)       | PCE (%)     |  |               |             |                           |              |             |
| 10 mg/mL      | 0.9952      | 8.4509                    | 45.7790      | 3.8502      |  |               |             |                           |              |             |
| 10 mg/mL      | 0.9836      | 8.4508                    | 45.2625      | 3.7623      |  |               |             |                           |              |             |
| 10 mg/mL      | 0.9899      | 8.4823                    | 45.9202      | 3.8556      |  |               |             |                           |              |             |
|               | <b>0.99</b> | <b>8.46</b>               | <b>45.65</b> | <b>3.82</b> |  |               |             |                           |              |             |

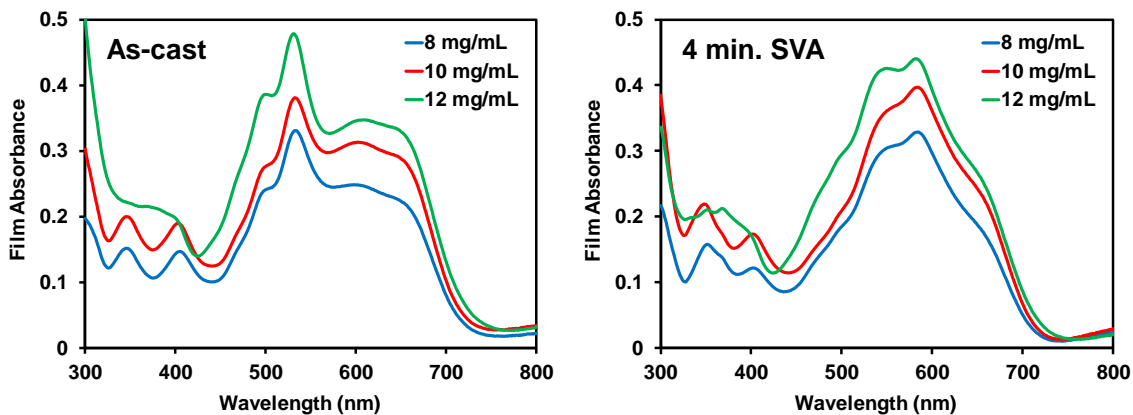

**Figure S15.** Optical absorption profiles for varying concentrations as-cast (left) and 4 minute solvent vapour annealed (right).

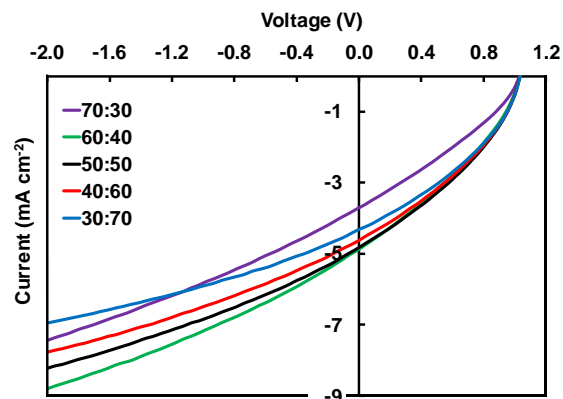

**Figure S16.** Current voltage curves for PDDT-BOBT:PDI-DPP-PDI optimization of as-cast active layer ratios.

**Table S5.** Device statistics for PDDT-BOBT:PDI-DPP-PDI as-cast ratio optimization.

| Ratio | Voc (V)     | Jsc (mAcm <sup>-2</sup> ) | FF (%)       | PCE (%)     | Ratio | Voc (V)     | Jsc (mAcm <sup>-2</sup> ) | FF (%)       | PCE (%)     |
|-------|-------------|---------------------------|--------------|-------------|-------|-------------|---------------------------|--------------|-------------|
| 70/30 | 1.0244      | 3.6076                    | 31.5741      | 1.1551      | 40/60 | 1.0305      | 4.7000                    | 35.0188      | 1.6960      |
| 70/30 | 1.0201      | 3.8118                    | 31.8498      | 1.2385      | 40/60 | 1.0151      | 4.4829                    | 35.6468      | 1.6222      |
| 70/30 | 1.0232      | 3.5785                    | 31.1479      | 1.1405      | 40/60 | 1.0221      | 4.7098                    | 33.4419      | 1.6098      |
| 70/30 | 1.0244      | 3.7214                    | 31.4924      | 1.2005      | 40/60 | 1.0187      | 4.6322                    | 33.9017      | 1.5998      |
|       | <b>1.02</b> | <b>3.68</b>               | <b>31.52</b> | <b>1.18</b> |       | <b>1.02</b> | <b>4.63</b>               | <b>34.50</b> | <b>1.63</b> |
| Ratio | Voc (V)     | Jsc (mAcm <sup>-2</sup> ) | FF (%)       | PCE (%)     | Ratio | Voc (V)     | Jsc (mAcm <sup>-2</sup> ) | FF (%)       | PCE (%)     |
| 60/40 | 1.0278      | 4.8933                    | 33.3916      | 1.6794      | 30/70 | 1.0311      | 4.2688                    | 35.9391      | 1.5819      |
| 60/40 | 1.0243      | 4.7568                    | 33.3339      | 1.6242      | 30/70 | 1.0306      | 4.1595                    | 36.2019      | 1.5519      |
| 60/40 | 1.0256      | 4.8392                    | 33.5451      | 1.6648      | 30/70 | 1.0326      | 4.3627                    | 36.4557      | 1.6422      |
| 60/40 | 1.0198      | 4.5595                    | 33.8925      | 1.5759      | 30/70 | 1.0112      | 4.1638                    | 37.4729      | 1.5777      |
|       | <b>1.02</b> | <b>4.76</b>               | <b>33.54</b> | <b>1.64</b> |       | <b>1.03</b> | <b>4.24</b>               | <b>36.52</b> | <b>1.59</b> |
| Ratio | Voc (V)     | Jsc (mAcm <sup>-2</sup> ) | FF (%)       | PCE (%)     |       |             |                           |              |             |
| 50/50 | 1.0270      | 4.9362                    | 34.3336      | 1.7405      |       |             |                           |              |             |
| 50/50 | 1.0219      | 4.7923                    | 34.3805      | 1.6837      |       |             |                           |              |             |
| 50/50 | 1.0275      | 4.8840                    | 34.9540      | 1.7540      |       |             |                           |              |             |
| 50/50 | 1.0248      | 4.7106                    | 34.9016      | 1.6848      |       |             |                           |              |             |
|       | <b>1.03</b> | <b>4.83</b>               | <b>34.64</b> | <b>1.72</b> |       |             |                           |              |             |

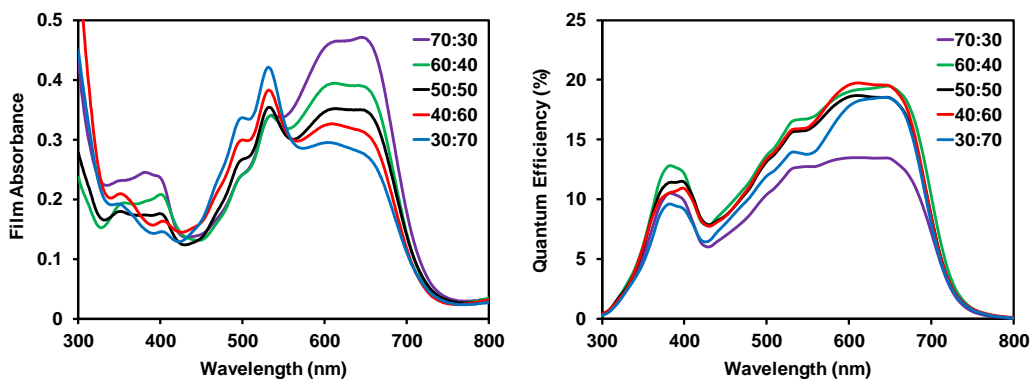

**Figure S17.** Optical absorption profiles (left) and external quantum efficiencies (right) for varying as-cast ratios.

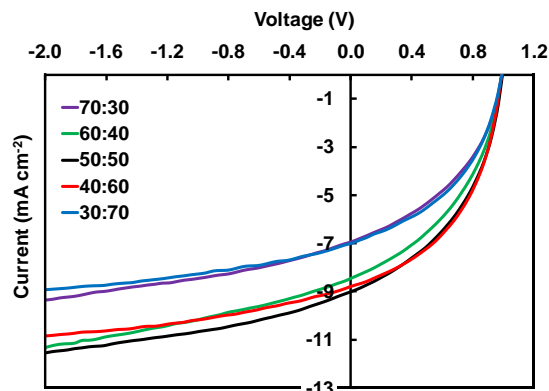

**Figure S18.** Current voltage curves for PDDT-BOBT:PDI-DPP-PDI optimization of 4 minute solvent vapour annealed active layer ratios.

**Table S6.** Device statistics for PDDT-BOBT:PDI-DPP-PDI 4 minute solvent vapour annealed ratio optimization.

| Ratio | Voc (V)     | Jsc (mAcm <sup>-2</sup> ) | FF (%)       | PCE (%)     | Ratio | Voc (V)     | Jsc (mAcm <sup>-2</sup> ) | FF (%)       | PCE (%)     |
|-------|-------------|---------------------------|--------------|-------------|-------|-------------|---------------------------|--------------|-------------|
| 70/30 | 0.9831      | 6.8362                    | 43.0254      | 2.8916      | 40/60 | 0.992249    | 8.3189                    | 43.9551      | 3.6283      |
| 70/30 | 0.9751      | 5.8149                    | 43.7340      | 2.4797      | 40/60 | 0.9906      | 8.4719                    | 43.5684      | 3.6565      |
| 70/30 | 0.9877      | 6.9471                    | 42.9979      | 2.9504      | 40/60 | 0.9873      | 8.6023                    | 47.1190      | 4.0018      |
| 70/30 | 0.9806      | 5.9836                    | 43.4312      | 2.5483      | 40/60 | 0.9899      | 8.8904                    | 46.8115      | 4.1197      |
|       | <b>0.98</b> | <b>6.40</b>               | <b>43.30</b> | <b>2.72</b> |       | <b>0.99</b> | <b>8.57</b>               | <b>45.36</b> | <b>3.85</b> |
| Ratio | Voc (V)     | Jsc (mAcm <sup>-2</sup> ) | FF (%)       | PCE (%)     | Ratio | Voc (V)     | Jsc (mAcm <sup>-2</sup> ) | FF (%)       | PCE (%)     |
| 60/40 | 0.9866      | 8.3674                    | 42.7371      | 3.5280      | 30/70 | 0.9612      | 7.7724                    | 39.8200      | 2.9750      |
| 60/40 | 0.9794      | 7.2419                    | 43.2978      | 3.0709      | 30/70 | 0.9891      | 6.9340                    | 44.4235      | 3.0468      |
| 60/40 | 0.9883      | 8.4849                    | 43.0123      | 3.6069      | 30/70 | 0.9717      | 8.0678                    | 40.4534      | 3.1712      |
| 60/40 | 0.9898      | 7.2448                    | 44.3770      | 3.1823      | 30/70 | 0.9909      | 7.1270                    | 43.7342      | 3.0886      |
|       | <b>0.99</b> | <b>7.83</b>               | <b>43.36</b> | <b>3.35</b> |       | <b>0.98</b> | <b>7.48</b>               | <b>42.11</b> | <b>3.07</b> |
| Ratio | Voc (V)     | Jsc (mAcm <sup>-2</sup> ) | FF (%)       | PCE (%)     |       |             |                           |              |             |
| 50/50 | 0.9893      | 8.9182                    | 43.9447      | 3.8770      |       |             |                           |              |             |
| 50/50 | 0.9885      | 7.9472                    | 45.2703      | 3.5565      |       |             |                           |              |             |
| 50/50 | 0.9924      | 9.0329                    | 44.5496      | 3.9935      |       |             |                           |              |             |
| 50/50 | 0.9857      | 7.9501                    | 45.1580      | 3.5389      |       |             |                           |              |             |
|       | <b>0.99</b> | <b>8.46</b>               | <b>44.73</b> | <b>3.74</b> |       |             |                           |              |             |

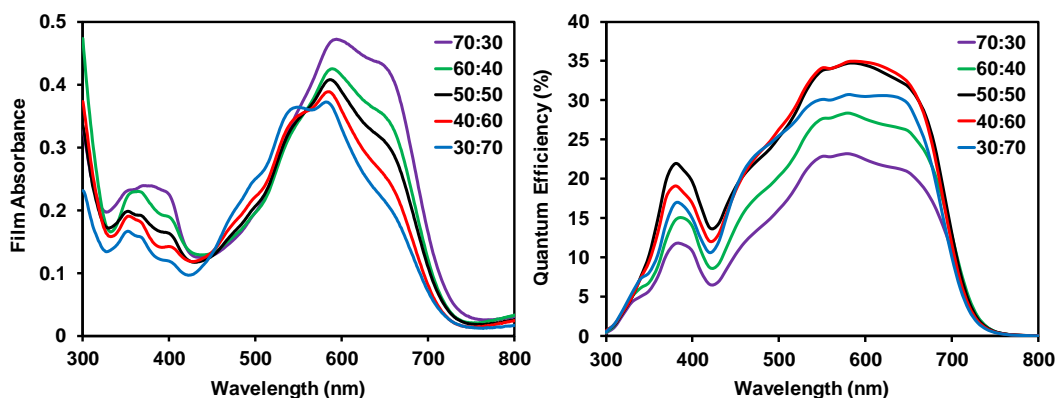

**Figure S19.** Optical absorption profiles (left) and external quantum efficiencies (right) for 4 minute solvent vapour annealed ratios.

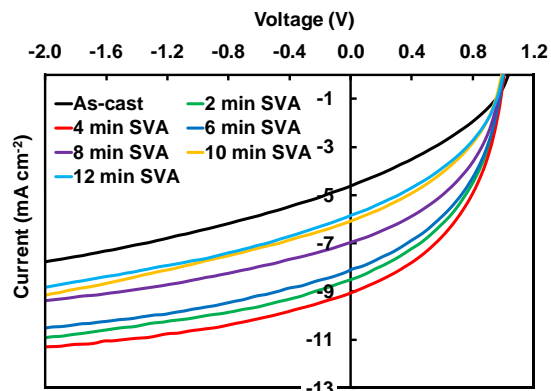

Figure S20. Current voltage curves for PDTT-BOBT:PDI-DPP-PDI optimization of solvent vapour annealing time.

Table S7. Device statistics for PDTT-BOBT:PDI-DPP-PDI solvent vapour annealing time optimization.

| SVA time | Voc (V)     | Jsc (mAcm <sup>-2</sup> ) | FF (%)       | PCE (%)     | SVA time | Voc (V)     | Jsc (mAcm <sup>-2</sup> ) | FF (%)       | PCE (%)     |
|----------|-------------|---------------------------|--------------|-------------|----------|-------------|---------------------------|--------------|-------------|
| As-cast  | 1.0305      | 4.7000                    | 35.0188      | 1.6960      | 8 min    | 0.980054    | 6.2043                    | 43.9815      | 2.6743      |
| As-cast  | 1.0151      | 4.4829                    | 35.6468      | 1.6222      | 8 min    | 0.9810      | 7.0040                    | 43.0570      | 2.9585      |
| As-cast  | 1.0221      | 4.7098                    | 33.4419      | 1.6098      | 8 min    | 0.9913      | 6.9986                    | 44.3997      | 3.0805      |
| As-cast  | 1.0187      | 4.6322                    | 33.9017      | 1.5998      | 8 min    | 0.9759      | 6.1310                    | 43.4825      | 2.6017      |
|          | <b>1.02</b> | <b>4.63</b>               | <b>34.50</b> | <b>1.63</b> |          | <b>0.98</b> | <b>6.58</b>               | <b>43.73</b> | <b>2.83</b> |
| SVA time | Voc (V)     | Jsc (mAcm <sup>-2</sup> ) | FF (%)       | PCE (%)     | SVA time | Voc (V)     | Jsc (mAcm <sup>-2</sup> ) | FF (%)       | PCE (%)     |
| 2 min    | 0.9914      | 8.4383                    | 45.0551      | 3.7693      | 10 min   | 0.9812      | 5.3126                    | 40.9750      | 2.1360      |
| 2 min    | 0.9996      | 8.5338                    | 45.1022      | 3.8474      | 10 min   | 0.9868      | 6.0473                    | 41.3064      | 2.4650      |
| 2 min    | 0.9881      | 8.5832                    | 42.5332      | 3.6073      | 10 min   | 0.9954      | 5.5738                    | 43.2779      | 2.4010      |
| 2 min    | 0.9912      | 8.4812                    | 44.0632      | 3.7044      | 10 min   | 0.9880      | 6.1082                    | 41.1083      | 2.4808      |
|          | <b>0.99</b> | <b>8.51</b>               | <b>44.19</b> | <b>3.73</b> |          | <b>0.99</b> | <b>5.76</b>               | <b>41.67</b> | <b>2.37</b> |
| SVA time | Voc (V)     | Jsc (mAcm <sup>-2</sup> ) | FF (%)       | PCE (%)     | SVA time | Voc (V)     | Jsc (mAcm <sup>-2</sup> ) | FF (%)       | PCE (%)     |
| 4 min    | 0.9946      | 9.1318                    | 43.7196      | 3.9707      | 12 min   | 0.9983      | 5.8707                    | 40.4327      | 2.3696      |
| 4 min    | 0.9975      | 8.9313                    | 45.7378      | 4.0748      | 12 min   | 0.9900      | 5.4648                    | 40.7199      | 2.2031      |
| 4 min    | 0.9916      | 9.1309                    | 43.6771      | 3.9547      | 12 min   | 0.9944      | 5.8665                    | 39.7573      | 2.3192      |
| 4 min    | 1.0028      | 9.0826                    | 45.5793      | 4.1515      | 12 min   | 0.9847      | 5.2994                    | 40.2751      | 2.1017      |
|          | <b>1.00</b> | <b>9.07</b>               | <b>44.68</b> | <b>4.04</b> |          | <b>0.99</b> | <b>5.63</b>               | <b>40.30</b> | <b>2.25</b> |
| SVA time | Voc (V)     | Jsc (mAcm <sup>-2</sup> ) | FF (%)       | PCE (%)     |          |             |                           |              |             |
| 6 min    | 0.9800      | 7.5873                    | 43.7829      | 3.2555      |          |             |                           |              |             |
| 6 min    | 0.9929      | 8.0028                    | 45.1120      | 3.5845      |          |             |                           |              |             |
| 6 min    | 0.9823      | 7.7177                    | 43.4511      | 3.2941      |          |             |                           |              |             |
| 6 min    | 0.9986      | 8.1026                    | 44.9001      | 3.6330      |          |             |                           |              |             |
|          | <b>0.99</b> | <b>7.85</b>               | <b>44.31</b> | <b>3.44</b> |          |             |                           |              |             |

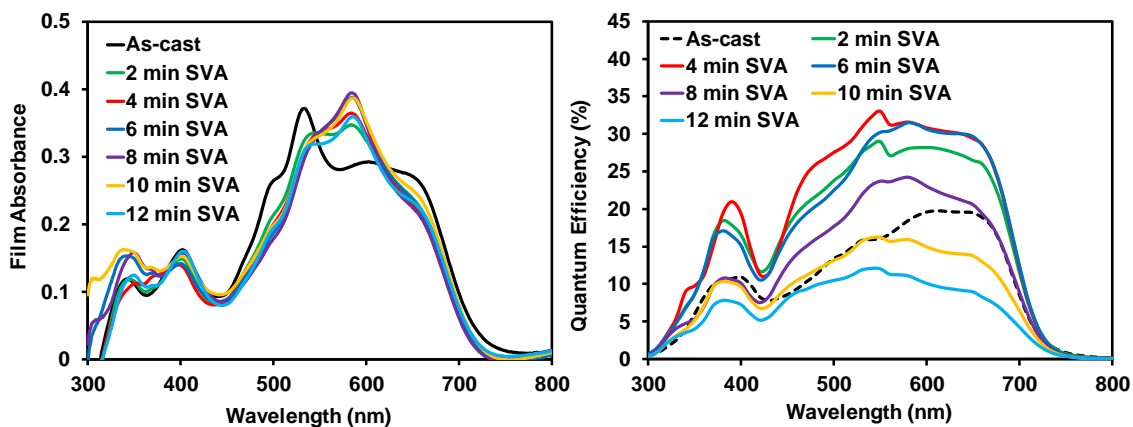

**Figure S21.** Optical absorption profiles (left) external quantum efficiencies (right) for solvent vapour annealing time.

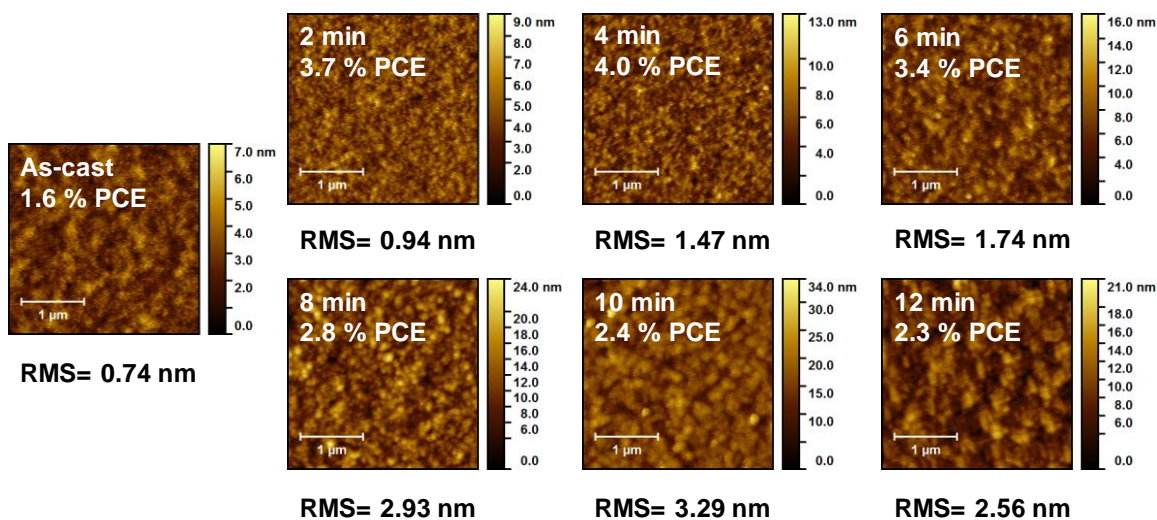

**Figure S22.** AFM images for solvent vapour annealing time optimization.



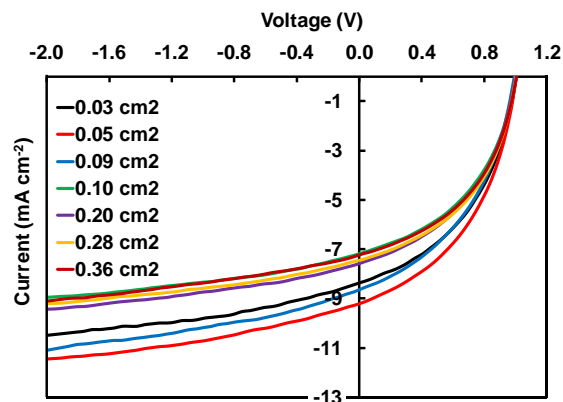

Figure S23. Current voltage curves for PDDT-BOBT:PDI-DPP-PDI optimization of device size.

Table S8. Device statistics for PDDT-BOBT:PDI-DPP-PDI device size optimization.

| Device Size          | Voc (V)     | Jsc (mAcm <sup>-2</sup> ) | FF (%)       | PCE (%)     | Device Size          | Voc (V)     | Jsc (mAcm <sup>-2</sup> ) | FF (%)       | PCE (%)     |
|----------------------|-------------|---------------------------|--------------|-------------|----------------------|-------------|---------------------------|--------------|-------------|
| 0.03 cm <sup>2</sup> | 1.0066      | 8.4351                    | 44.6788      | 3.7938      | 0.10 cm <sup>2</sup> | 1.0025      | 7.2040                    | 45.2296      | 3.2665      |
| 0.03 cm <sup>2</sup> | 1.0010      | 7.7522                    | 45.1306      | 3.5022      | 0.10 cm <sup>2</sup> | 0.9980      | 7.2769                    | 44.8873      | 3.2597      |
| 0.03 cm <sup>2</sup> | 0.9997      | 7.9933                    | 44.8326      | 3.5826      |                      | <b>1.00</b> | <b>7.24</b>               | <b>45.06</b> | <b>3.26</b> |
| 0.03 cm <sup>2</sup> | 1.0076      | 8.3503                    | 44.9422      | 3.7813      |                      |             |                           |              |             |
|                      | <b>1.00</b> | <b>8.13</b>               | <b>44.90</b> | <b>3.66</b> | Device Size          | Voc (V)     | Jsc (mAcm <sup>-2</sup> ) | FF (%)       | PCE (%)     |
|                      |             |                           |              |             | 0.20 cm <sup>2</sup> | 1.0016      | 7.5947                    | 45.0781      | 3.4291      |
| Device Size          | Voc (V)     | Jsc (mAcm <sup>-2</sup> ) | FF (%)       | PCE (%)     | 0.20 cm <sup>2</sup> | 1.0000      | 7.3386                    | 45.1426      | 3.3128      |
| 0.05 cm <sup>2</sup> | 0.9997      | 8.2852                    | 44.9271      | 3.7212      |                      | <b>1.00</b> | <b>7.47</b>               | <b>45.11</b> | <b>3.37</b> |
| 0.05 cm <sup>2</sup> | 1.0014      | 9.0421                    | 44.3718      | 4.0179      |                      |             |                           |              |             |
| 0.05 cm <sup>2</sup> | 1.0032      | 9.2411                    | 44.8447      | 4.1575      | Device Size          | Voc (V)     | Jsc (mAcm <sup>-2</sup> ) | FF (%)       | PCE (%)     |
| 0.05 cm <sup>2</sup> | 1.0026      | 8.6569                    | 44.6916      | 3.8789      | 0.28 cm <sup>2</sup> | 1.0053      | 7.4500                    | 46.1658      | 3.4575      |
| 0.05 cm <sup>2</sup> | 0.9948      | 8.7498                    | 43.2284      | 3.7627      | 0.28 cm <sup>2</sup> | 0.9973      | 7.6634                    | 43.9780      | 3.3610      |
| 0.05 cm <sup>2</sup> | 0.9943      | 9.0254                    | 43.7668      | 3.9276      | 0.28 cm <sup>2</sup> | 0.9965      | 7.2637                    | 44.3312      | 3.2089      |
| 0.05 cm <sup>2</sup> | 0.9961      | 9.0246                    | 43.9616      | 3.9519      |                      | <b>1.00</b> | <b>7.46</b>               | <b>44.82</b> | <b>3.34</b> |
|                      | <b>1.00</b> | <b>8.86</b>               | <b>44.26</b> | <b>3.92</b> |                      |             |                           |              |             |
|                      |             |                           |              |             | Device Size          | Voc (V)     | Jsc (mAcm <sup>-2</sup> ) | FF (%)       | PCE (%)     |
| Device Size          | Voc (V)     | Jsc (mAcm <sup>-2</sup> ) | FF (%)       | PCE (%)     | 0.36 cm <sup>2</sup> | 1.0044      | 7.2511                    | 45.8913      | 3.3423      |
| 0.09 cm <sup>2</sup> | 0.9892      | 8.8941                    | 44.1323      | 3.8829      | 0.36 cm <sup>2</sup> | 1.0019      | 7.1621                    | 45.5944      | 3.2718      |
| 0.09 cm <sup>2</sup> | 0.9926      | 9.2197                    | 43.3003      | 3.9625      |                      | <b>1.00</b> | <b>7.21</b>               | <b>45.74</b> | <b>3.31</b> |
| 0.09 cm <sup>2</sup> | 0.9916      | 9.2109                    | 42.6365      | 3.8943      |                      |             |                           |              |             |
|                      | <b>0.99</b> | <b>9.11</b>               | <b>43.36</b> | <b>3.91</b> |                      |             |                           |              |             |

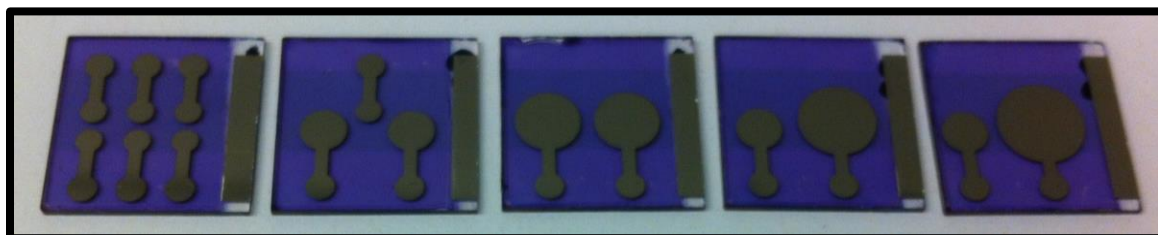

**Table S9.** Device statistics for **PDTT-BOBT:PDI-DPP-PDI** devices in final optimized screening.

| Processing | Voc (V)     | Jsc (mAcm <sup>-2</sup> ) | FF (%)       | PCE (%)     |
|------------|-------------|---------------------------|--------------|-------------|
| As-cast    | 1.0294      | 5.3697                    | 34.8453      | 1.9261      |
| As-cast    | 1.0258      | 4.8641                    | 34.1100      | 1.7019      |
| As-cast    | 1.0229      | 4.8362                    | 34.2848      | 1.6960      |
| As-cast    | 1.0276      | 5.4073                    | 34.4377      | 1.9136      |
|            | <b>1.03</b> | <b>5.12</b>               | <b>34.42</b> | <b>1.81</b> |
|            |             |                           |              |             |
| Processing | Voc (V)     | Jsc (mAcm <sup>-2</sup> ) | FF (%)       | PCE (%)     |
| SVA 4 min  | 0.9906      | 9.8910                    | 45.6477      | 4.4728      |
| SVA 4 min  | 0.9880      | 9.1990                    | 45.4850      | 4.1341      |
| SVA 4 min  | 0.9901      | 9.5116                    | 43.5553      | 4.1018      |
| SVA 4 min  | 0.9980      | 9.9120                    | 44.5890      | 4.4110      |
|            | <b>0.99</b> | <b>9.63</b>               | <b>44.82</b> | <b>4.28</b> |

## Control Devices

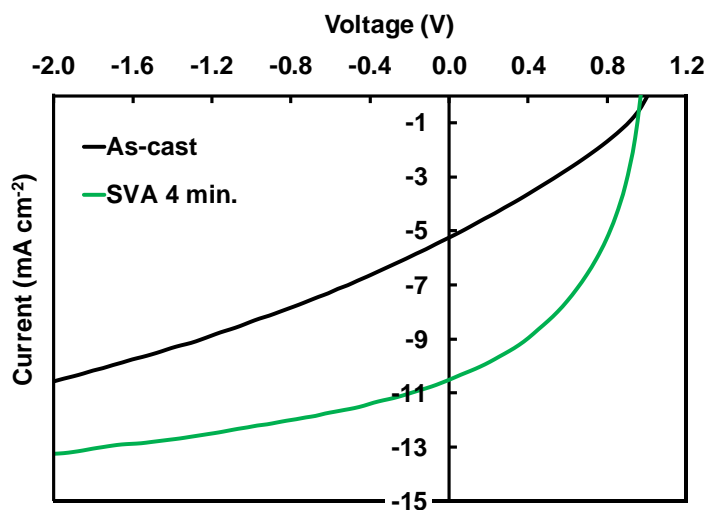

Figure S24. Current voltage curves for PTB7-Th:PDI-DPP-PDI control devices.

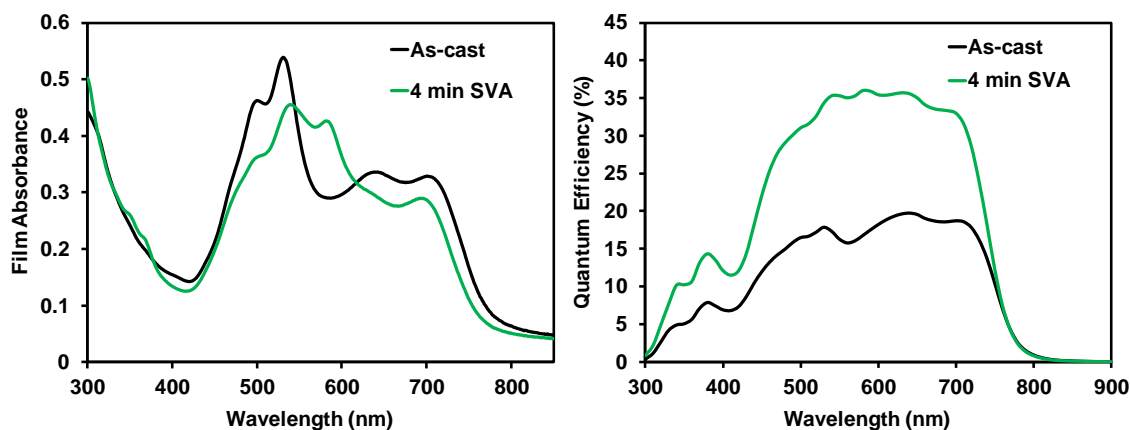

Figure S25. Optical absorption profiles (left) external quantum efficiencies (right) for PTB7-Th:PDI-DPP-PDI.

Table S10. Device statistics for PTB7-Th:PDI-DPP-PDI control devices.

| PTB7-Th:PDI-DPP-PDI As-cast | Voc (V)     | Jsc (mAcm <sup>-2</sup> ) | FF (%)       | PCE (%)    |
|-----------------------------|-------------|---------------------------|--------------|------------|
|                             | 1.007294    | 5.238871                  | 30.21127     | 1.594274   |
|                             | 1.008543    | 5.349355                  | 29.74575     | 1.604799   |
|                             | 1.000214    | 5.274644                  | 30.84561     | 1.627344   |
|                             | 1.005955    | 5.293142                  | 31.16262     | 1.659305   |
|                             | <b>1.01</b> | <b>5.29</b>               | <b>30.5</b>  | <b>1.6</b> |
| <b>Best in Literature</b>   | <b>0.97</b> | <b>6.41</b>               | <b>35.20</b> | <b>2.2</b> |
| PTB7-Th:PDI-DPP-PDI SVA     | Voc (V)     | Jsc (mAcm <sup>-2</sup> ) | FF (%)       | PCE (%)    |
|                             | 0.9617      | 11.2572                   | 42.1452      | 4.5627     |
|                             | 0.9688      | 10.9286                   | 43.5634      | 4.6123     |
|                             | 0.9664      | 10.5498                   | 45.1400      | 4.6023     |
|                             | 0.9641      | 10.6259                   | 45.1454      | 4.6250     |
|                             | <b>0.97</b> | <b>10.84</b>              | <b>44.0</b>  | <b>4.6</b> |
| <b>Best in Literature</b>   | <b>0.98</b> | <b>11.32</b>              | <b>50.1</b>  | <b>5.6</b> |

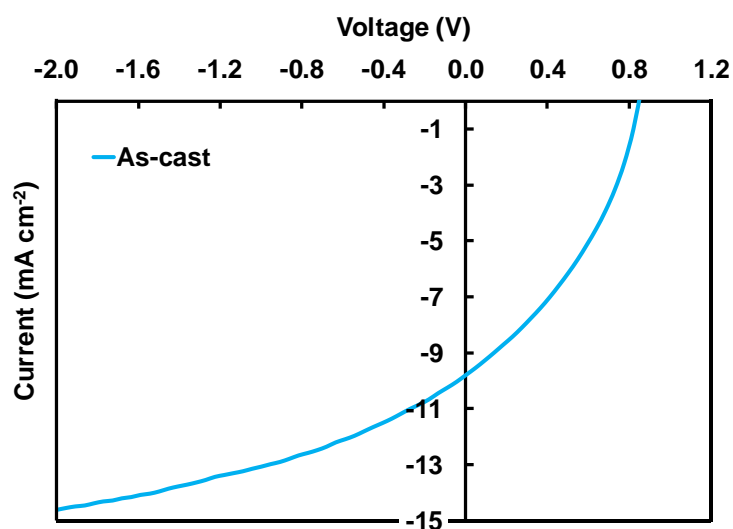

Figure S26. Current voltage curves for PDTT-BOBT:PC<sub>61</sub>BM control devices.

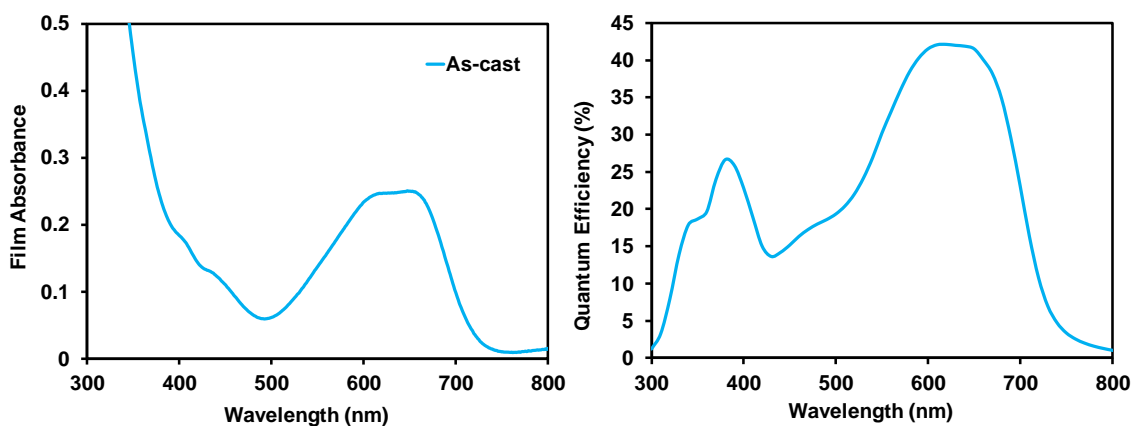

Figure S27. Optical absorption profiles (left) external quantum efficiencies (right) for PDTT-BOBT:PC<sub>61</sub>BM.

Table S11. Device statistics for PDTT-BOBT:PC<sub>61</sub>BM control devices.

| PDTT-BOBT:PC <sub>61</sub> BM As-cast | V <sub>oc</sub> (V) | J <sub>sc</sub> (mAcm <sup>-2</sup> ) | FF (%)         | PCE (%)       |
|---------------------------------------|---------------------|---------------------------------------|----------------|---------------|
|                                       | 0.8494              | 9.2726                                | 37.4002        | 2.9458        |
|                                       | 0.8463              | 9.4320                                | 37.0278        | 2.9556        |
|                                       | 0.8404              | 9.5277                                | 36.8803        | 2.9529        |
|                                       | 0.8532              | 9.4453                                | 37.0747        | 2.9878        |
|                                       | <b>0.8466</b>       | <b>9.7969</b>                         | <b>37.4304</b> | <b>3.1046</b> |
|                                       | 0.8506              | 9.6171                                | 37.5970        | 3.0757        |
|                                       | <b>0.85</b>         | <b>9.52</b>                           | <b>37.24</b>   | <b>3.00</b>   |

## Device Stability

**Thermal Stability** – The thermal stability of **PDTT-BOBT:PDI-DPP-PDI** was measured by heating a device at 80 °C in air for 60 minutes. At 10, 20, 40 and 60 minute intervals the device performance was measured once the device had reached room temperature. The EQE profiles were obtained from the initial device and at the end of the thermal experiments.

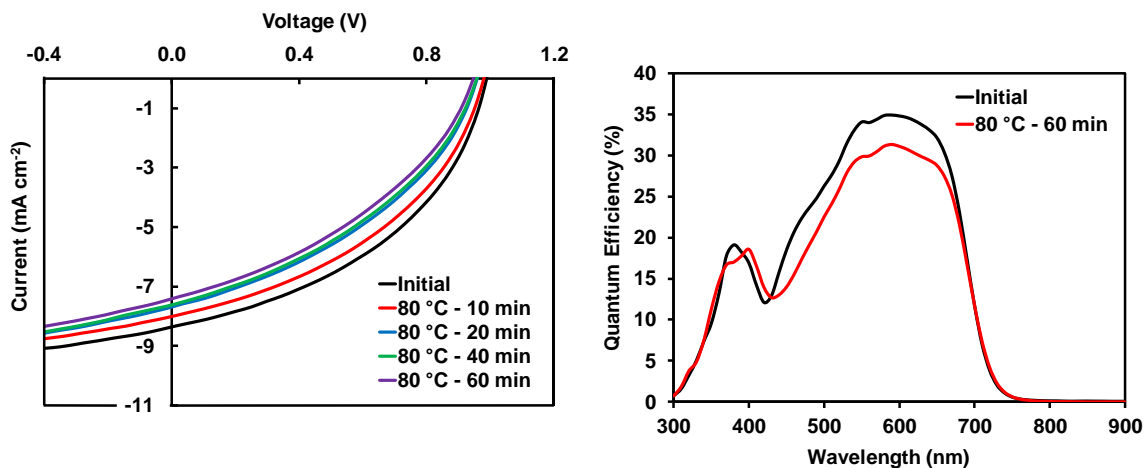

**Figure S28.** Current voltage curves for **PDTT-BOBT:PC<sub>61</sub>BM** control devices (left) and EQE profiles (right).

**Table S12.** Device statistics for **PDTT-BOBT:PC<sub>61</sub>BM** thermal stability measurements.

| Time at 80 °C | Voc (V) | Jsc (mAcm <sup>-2</sup> ) | FF (%) | PCE (%) |
|---------------|---------|---------------------------|--------|---------|
| 0             | 0.99    | 8.89                      | 43.92  | 3.85    |
| 10            | 0.98    | 8.52                      | 42.31  | 3.53    |
| 20            | 0.96    | 8.14                      | 40.07  | 3.13    |
| 40            | 0.96    | 8.03                      | 39.57  | 3.04    |
| 60            | 0.95    | 7.85                      | 38.85  | 2.88    |

**Air/Light Stability** – The air and light stability of **PDTT-BOBT:PDI-DPP-PDI** was measured from three different devices. One device was left in air with no light exposure, a second was left in air under ambient light and a third was left in air in direct sunlight. Device performance, absorption profiles and EQE profiles were measured 14 days after exposure to these various conditions.

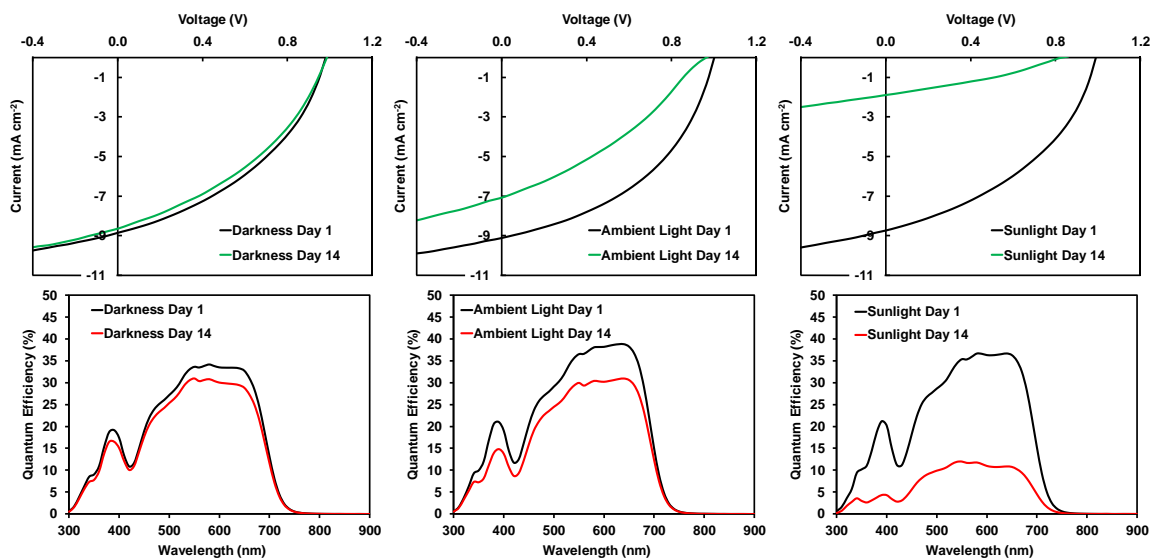

**Figure S29.** Current voltage curves for **PDTT-BOBT:PDI-DPP-PDI** air/light stability devices (top) and their respective external quantum efficiencies (bottom).

**Table S13.** Device results for **PDTT-BOBT:PDTT-BOBT** air/light stability measurements.

| Sunlight             | Voc (V) | Jsc (mAcm <sup>-2</sup> ) | FF (%) | PCE (%) |
|----------------------|---------|---------------------------|--------|---------|
| Day 1                | 0.99    | 9.35                      | 41.54  | 3.85    |
| Day 14               | 0.84    | 2.02                      | 32.05  | 0.54    |
| <b>Ambient Light</b> |         |                           |        |         |
|                      | Voc (V) | Jsc (mAcm <sup>-2</sup> ) | FF (%) | PCE (%) |
| Day 1                | 1.00    | 9.66                      | 44.64  | 4.31    |
| Day 14               | 0.96    | 7.49                      | 33.30  | 2.41    |
| <b>Darkness</b>      |         |                           |        |         |
|                      | Voc (V) | Jsc (mAcm <sup>-2</sup> ) | FF (%) | PCE (%) |
| Day 1                | 0.98    | 9.46                      | 40.89  | 3.79    |
| Day 14               | 0.99    | 9.27                      | 38.74  | 3.54    |

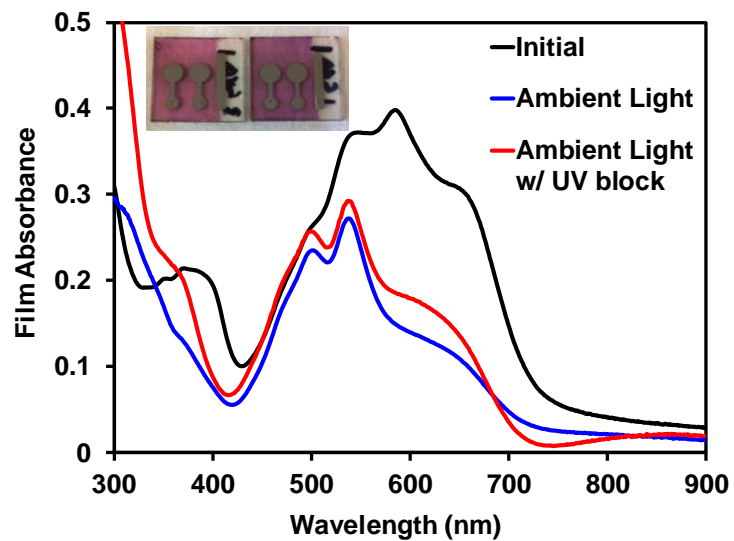

**Figure S30.** Optical absorption profiles of **PDDT-BOBT:PDI-DPP-PDI** under air/light stability conditions with and without UV-light protection.

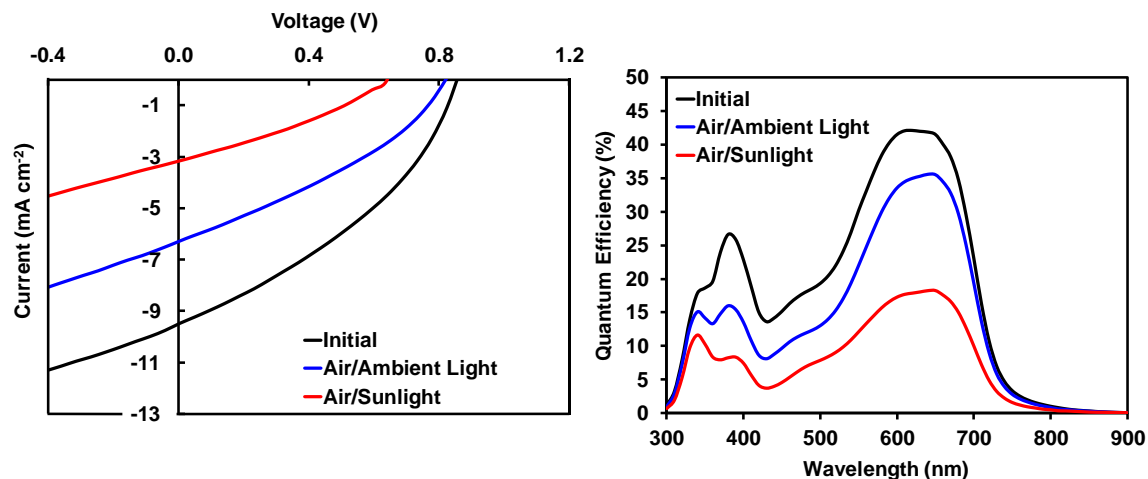

**Figure S30.** Current voltage curves for **PDTT-BOBT:PC<sub>61</sub>BM** air/light stability devices (left) and their respective external quantum efficiencies (right).

**Table S13.** Device results for **PDTT-BOBT:PC<sub>61</sub>BM** air/light stability measurements.

|               | Voc (V) | Jsc (mAcm <sup>-2</sup> ) | FF (%) | PCE (%) |
|---------------|---------|---------------------------|--------|---------|
| Initial       | 0.86    | 9.51                      | 37.17  | 3.03    |
| Ambient Light | 0.82    | 6.30                      | 33.90  | 1.75    |
| Sunlight      | 0.65    | 3.17                      | 31.59  | 0.65    |

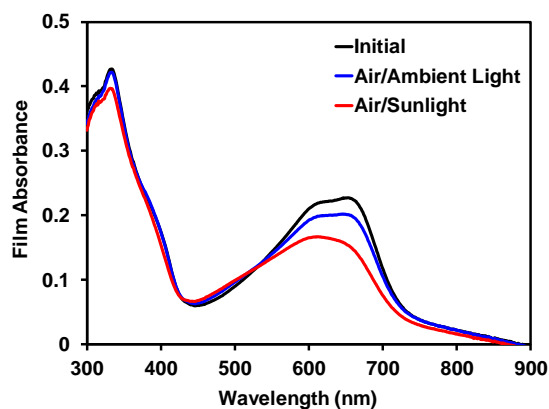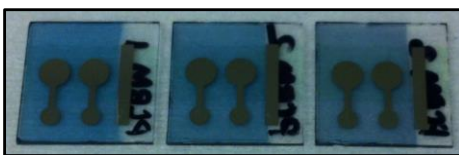

**Figure S32.** Optical absorption profiles of **PDTT-BOBT:PC<sub>61</sub>BM** under air/light stability conditions.



## Active layer thickness

The active layer thickness was measured by atomic force microscopy. A thin-film of **PDTT-BOBT:PDI-DPP-PDI** cast on an ITO/glass substrate was cut down to the substrate with a scalpel and it scanned at 50X50 nm, then the thickness of the film was measured by measuring the profile left from the scalpel using Gwyddion software program.

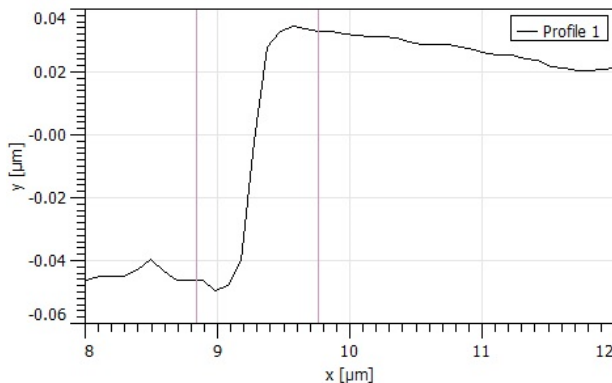

**Figure S33.** Plot measuring the active layer thickness of **PDTT-BOBT:PDI-DPP-PDI** cast with optimized processing conditions onto an ITO/glass substrate.

The active layer thickness was measured by atomic force microscopy. A thin-film of **PDTT-BOBT:PDI-DPP-PDI** cast on an ITO/glass substrate was cut down to the substrate with a scalpel and it scanned at 50X50 nm, then the thickness of the film was measured by measuring the profile left from the scalpel using Gwyddion software program.

## Solution UV-vis spectra

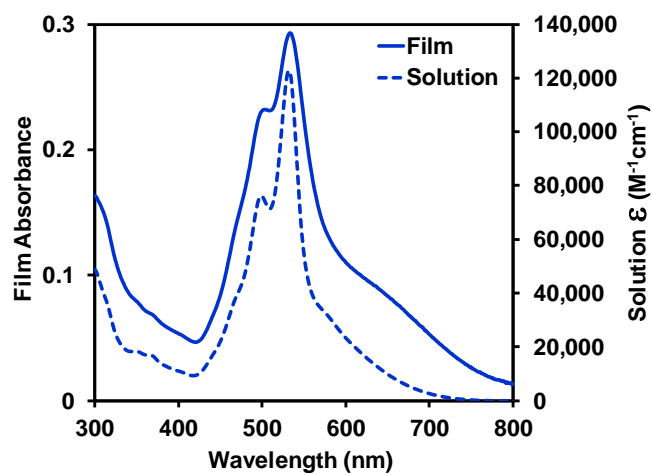

**Figure S34.** Solution and thin-film optical absorption profiles of **PDI-DPP-PDI**. Full characterization data can also be found in our previous work.<sup>2,5</sup>

## **References**

- 1J. Pommerehne, H. Vestweber, W. Guss, R. F. Mahrt, H. Bässler, M. Porsch and J. Daub, *Adv. Mater.*, 1995, **7**, 551–554.
- 2S. M. McAfee, S. V. Dayneko, P. Josse, P. Blanchard, C. Cabanetos and G. C. Welch, *Chem. Mater.*, 2017, **29**, 1309–1314.
- 3G. P. Kini, S. K. Lee, W. S. Shin, S.-J. Moon, C. E. Song and J.-C. Lee, *J. Mater. Chem. A*, 2016, **4**, 18585–18597.
- 4Y. Sun, J. H. Seo, C. J. Takacs, J. Seifert and A. J. Heeger, *Adv. Mater.*, 2011, **23**, 1679–1683.
- 5S. M. McAfee, S. V. Dayneko, A. D. Hendsbee, P. Josse, P. Blanchard, C. Cabanetos and G. C. Welch, *J. Mater. Chem. A*, 2017, **5**, 11623–11633.
